# Supplementary material for: Clinical Profiles, Risk Factors, and Radiological Findings of Cerebral Venous and Dural Sinus Thrombosis: A 10-Year Retrospective Review
Source: Research Square preprint supplement (doi:10.21203/rs.3.rs-7643666/v1), 2025-11-20
Supplement: Supplementary file 1 [file faf97edef4410e63a2b72d91.docx]

**Questionnaire**

**Questionnaire for Study of The Clinical Profile, Risk Factors and Radiological Findings of cerebral venous and Dural Sinus Thrombosis: A 10-year Retrospective Review of Cases at Yehuleshet Specialized Clinic, Ethiopia*.***

1. Name & Signature of Data Collector__________________
2. Date________________________
3. Participants ID No.____________
4. **Socio-demographic Data**

| **No.** | **Socio-Demographic Questions** | **Choice of answer** |
| --- | --- | --- |
| 1.1 | Age(In years at last Birthday) | __________ years |
| 1.2 | Gender | 1.Male  2.Female |
| 1.3 | Address | 1.Urban  2.Rural |
| 1.4 | Marital status | 1.Not married  2.Married  3.Divorced  4.Widowed  5.No Response |
| 1.5 | Ethnicity | 1.Amhara  2.Oromo  3.Tigre  4.Gurage  5.Other,Specify------------- |
| 1.6 | Occupation |  |

**2. Clinical Characteristics**

I. Weight_____ II. Height______ III.BMI.________

| **No.** | **Clinic Characteristics** | **If yes** | **Duration of symptoms (In days)** |
| --- | --- | --- | --- |
| **2.1** | **Symptoms** |  |  |
| 2.1.1 | Headache |  |  |
|  | Diffuse |  |  |
|  | Localized |  |  |
| 2.1.2 | Seizures |  |  |
|  | Generalized |  |  |
|  | Focal |  |  |
| 2.1.3 | Decreased level of consciousness |  |  |
| 2.1.4 | Extremity Weakness |  |  |
|  | Monoparesis/Plegeia |  |  |
|  | Hemiparesis/Plegia |  |  |
|  | Para paresis/plegia |  |  |
| 2.1.5 | Aphasia |  |  |
| 2.1.6 | Obscuration of vision |  |  |
| 2.1.7 | Double vision |  |  |
| 2.1.8 | Orbital pain/ chemosis |  |  |
| 2.1.9 | Tinnitus |  |  |
| 2.1.10 | Ear discharge |  |  |
| 2.1.11 | Pain in the ear or mastoid region |  |  |
| 2.1.12 | Unilateral deafness |  |  |
| 2.1.13 | Vomiting |  |  |
| 2.1.14 | Memory Alternation |  |  |
| 2.1.15 | Paresthesias |  |  |
| **2.2** | **Physical Examination** |  |  |
| 2.2.1 | Scalp edema & dilated scalp veins |  |  |
| 2.2.2 | Proptosis/Periorbital Ecchymosis |  |  |
| 2.2.3 | Mastoid Tenderness |  |  |
| 2.2.4 | Visible Ear Discharge(purulent otorrhea) |  |  |
| 2.2.5 | Otoscope: A bulged tympanic membrane |  |  |
| 2.2.6 | GCS |  |  |
| 2.2.7 | Mini Mental Status Examination |  |  |
| 2.2.8 | CN II (Visual fields/ Acuity/ Funduscopic) |  |  |
| 2.2.9 | CN III,IV,VI |  |  |
| 2.2.10 | CN V |  |  |
| 2.2.11 | CN VII |  |  |
| 2.2.12 | CN IX, X, XI, and XII |  |  |
| 2.2.13 | Power of Extremities: Rt UE/Lt UE/Rt LE/Lt LE |  |  |
| 2.2.14 | Sensory Examination (light touch, pain and temperature, vibration, joint position) |  |  |
| 2.2.15 | Nuchal rigidity |  |  |
| 2.2.16 | Other Pertinent Finding |  |  |

**3. Risk factors**

| **3. 1** | **Infection** |  |
| --- | --- | --- |
|  | Central nervous system |  |
|  | Ear, sinus, mouth, face, and neck |  |
|  | Systemic infectious disease |  |
| **3.2** | **Pregnancy and puerperium** |  |
|  | If Px weeks of Gestational Age |  |
|  | If Postpartum weeks of postpartum period |  |
| **3.3** | **Mechanical precipitants** |  |
|  | Head injury |  |
|  | Lumbar puncture |  |
|  | Neurosurgical procedures |  |
|  | Jugular catheter occlusion |  |
| **3.4** | **Drugs** |  |
|  | Oral contraceptives |  |
|  | Hormone replacement therapy |  |
|  | Antineoplastic (tamoxifen, L-asparaginase) |  |
|  | Glucocorticoids |  |
|  | Other |  |
| **3.5** | **Malignancy** |  |
|  | Central nervous system |  |
|  | Solid tumour outside central nervous system |  |
|  | Hematologic |  |
| **3.6** | **Hematologic condition** |  |
|  | Protein C deficiency |  |
|  | Protein S deficiency |  |
|  | Anti-thrombin deficiency |  |
|  | Factor V Leiden mutation |  |
|  | G20210A prothrombin gene mutation |  |
|  | Antiphospholipid syndrome |  |
|  | Myeloproliferative neoplasms |  |
|  | Nephrotic syndrome |  |
|  | Paroxysmal nocturnal hemoglobinuria |  |
|  | Hyperhomocysteinemia |  |
|  | Polycythemia, thrombocythemia |  |
|  | Anemia |  |
| **3.7** | **Inflammatory diseases** |  |
|  | Systemic lupus erythematosus |  |
|  | Inflammatory bowel disease |  |
|  | Sarcoidosis |  |
|  | Other |  |
| **3.8** | **Central nervous system disorders** |  |
|  | Dural fistulae |  |
|  | other |  |
| **3.9** | **Other disorders** |  |
|  | Congenital heart disease |  |
|  | Thyroid disease |  |
| **3.10** | **None identified Cause** |  |
| **3.11** | **Comorbid Conditions** |  |

**4. Laboratory Test**

| **No.** | **Laboratory Tests** | **Value** |
| --- | --- | --- |
| 4.1 | Complete Blood Count |  |
|  | WBC (N & L %) |  |
|  | Hemoglobin |  |
|  | platelet counts |  |
| 4.2 | ESR |  |
| 4.3 | RFT(Cr/Bun) |  |
| 4.4 | Liver Biochemical Test(AST/ALT/ALP) |  |
| 4.5 | Total Protein/Albumin |  |
| 4.6 | PT/PTT/INR |  |
| 4.7 | Urine protein |  |
| 4.8 | ANA |  |
| 4.9 | Vitamin B12 |  |
| 4.10 | Serum/RBC Folate |  |
| 4.11 | Serum VDRL/RPR/TPHA |  |
| 4.12 | Serum 25(OH) Vitamin D level |  |
| 4.13 | Serum Homocysteine Level |  |
| 4.14 | Protein S |  |
| 4.15 | Protein C |  |
| 4.16 | Anti-thrombin III |  |
| 4.17 | Leiden factor V mutation |  |
| 4.18 | Prothrombin G20210A mutation |  |
| 4. 19 | Lupus anticoagulant |  |
| 4.20 | Anti-cardiolipin antibodies |  |
| 4.21 | Anti-beta2 glycoprotein-I antibodies |  |
| 4.22 | D-Dimer |  |
| 4.23 | CSF Analysis(cell/protein/Glucose/VDRL/G |  |
|  | WBC |  |
|  | RBC |  |
|  | Protein |  |
|  | Glucose |  |
|  | Gram Stain |  |
|  | AFB/Gene X-pert |  |
|  | VDRL |  |
| 4.24 | **Other Pertinent Test** |  |
|  |  |  |

**5.** **NEUROIMAGING**

| **No.** | **NEUROIMAGING** | **Imaging Finding** |
| --- | --- | --- |
| 5.1 | Head CT |  |
|  | Non-contrast CT |  |
|  | Contrast CT |  |
| 5.2 | CT venography |  |
| 5.3 | MRI |  |
| 5.4 | MR venography |  |
| 5.5 | EEG |  |
| 5.6 | Other |  |

**6. Distribution of Thrombosis in MRV/CTV**

| **No.** | **Major cerebral veins and sinuses Involved** |  |
| --- | --- | --- |
| 6.1 | Superior sagittal sinus |  |
| 6.2 | Transverse sinus left |  |
| 6.3 | Transverse sinus right |  |
| 6.4 | Sigmoid sinus left |  |
| 6.5 | Sigmoid sinus right |  |
| 6.6 | Straight sinus |  |
| 6.7 | Inferior sagittal sinus |  |
| 6.8 | Internal cerebral vein of Galen |  |
| 6.9 | Cortical veins |  |
| 6.10 | Jugular veins left |  |
| 6.11 | Jugular veins right |  |
| 6.12 | Cerebellar veins |  |
| 6.13 | Cavernous sinus left |  |
| 6.14 | Cavernous sinus right |  |
| 6.15 | other |  |
